# Supplementary material
Source: PubMed Central journal article supplement (PMC8424527)
Supplement: jamainternmed-e215022-s001.pdf [file jamainternmed-e215022-s001.pdf]

## Supplemental Online Content

Falvey JR, Cohen AB, O'Leary JR, Leo-Summers L, Murphy TE, Ferrante LE. Association of social isolation with disability burden and 1-year mortality among older adults with critical illness. *JAMA Intern Med*. Published online September 7, 2021. doi:10.1001/jamainternmed.2021.5022

**eMethods.** Additional Details on Social Isolation Scale Items and Scoring

**eReferences.**

This supplemental material has been provided by the authors to give readers additional information about their work.

## eMethods. Additional Details on Social Isolation Scale Items and Scoring

Below is a description of the survey questions from the National Health and Aging Trends Study (NHATS) used to calculate the social isolation score developed by Pohl and colleagues<sup>1</sup> used in our models. The score ranges from 0 to 6 with higher scores indicating greater isolation.

| <b>Social Isolation Domain</b>     | <b>NHATS Question</b>                                                                                      | <b>Scoring</b>                                                          |
|------------------------------------|------------------------------------------------------------------------------------------------------------|-------------------------------------------------------------------------|
| Marriage or Partnership            | Are you currently married, living with a partner, separated, divorced, widowed, or never married           | One point if not married or living with a partner                       |
| Connections with family or friends | Looking back over the past year, who are the people you talked with most about often important things?     | One point if no family identified<br>One point if no friends identified |
|                                    | In the last month, did you ever visit with family or friends not living with you, either at home or theirs | One point if answered "no"                                              |
| Club Participation                 | In the past month, did you ever participate in clubs, classes, or other organized activities               | One point if answered "no"                                              |
| Religious Service Participation    | In the past month, did you ever attend religious services                                                  | One point if answered "no"                                              |

## eReferences

1. Pohl JS, Cochrane BB, Schepp KG, Woods NF. Measuring social isolation in the national health and aging trends study. *Research in Gerontological Nursing*. 2017;10(6):277-287.
